# Supplementary material for: BCL2L13 promotes mitophagy through DNM1L-mediated mitochondrial fission in glioblastoma
Source: PubMed Central journal article supplement (PMC10475114; doi:10.1038/s41419-023-06112-4), 2023-09-02

# Figure 1

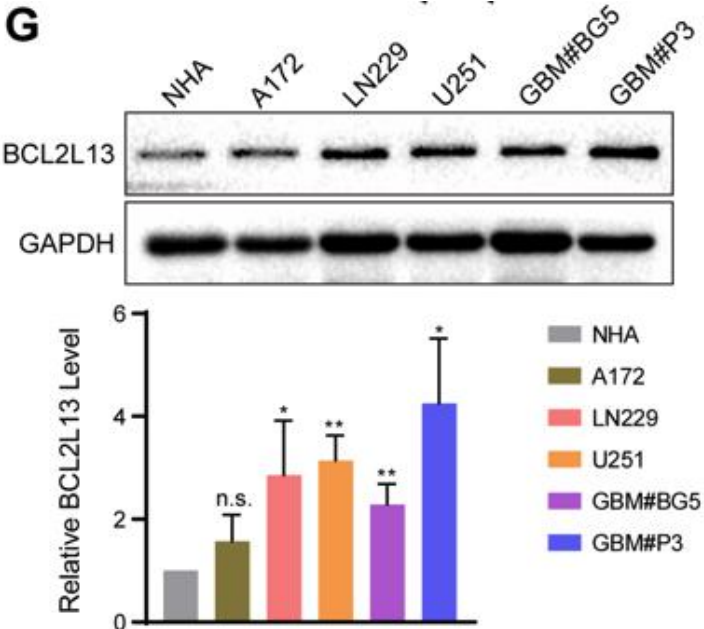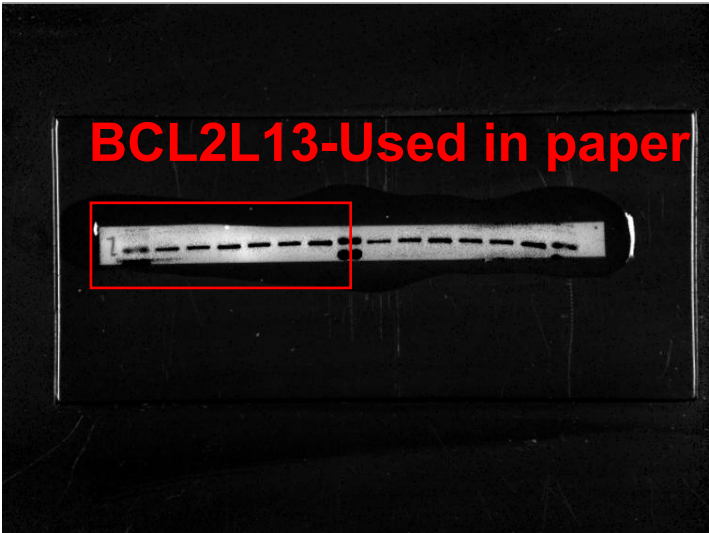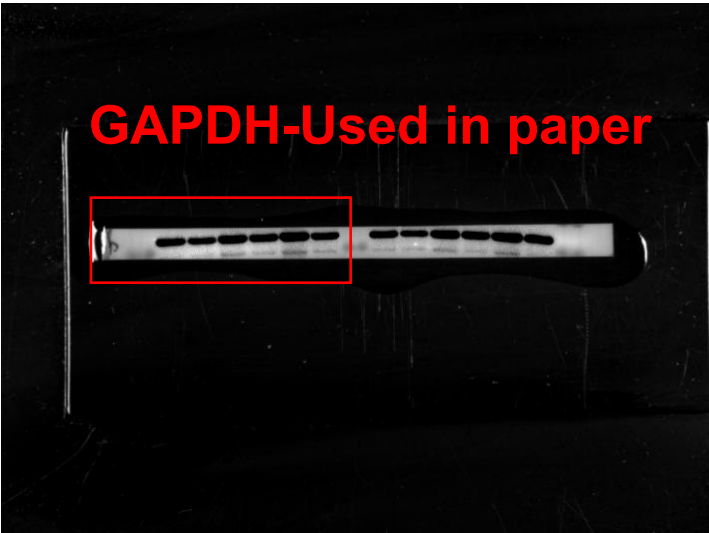

# Figure 2

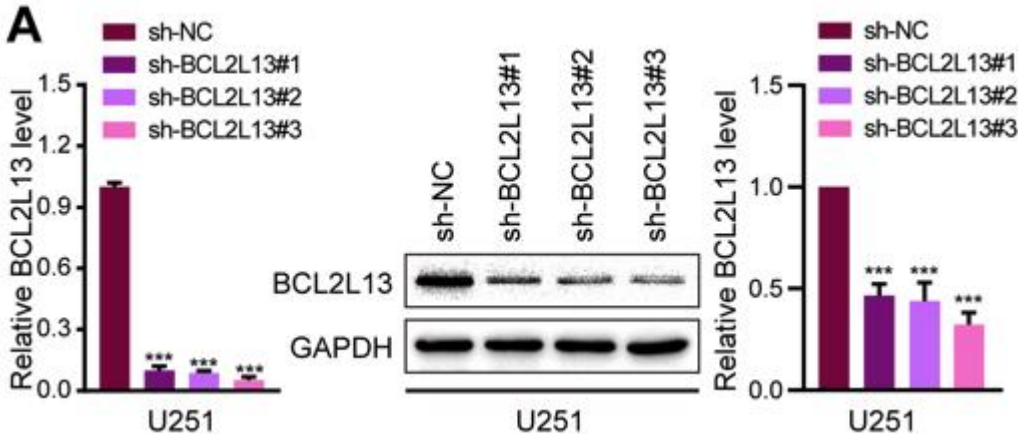

**BCL2L13-Used in paper**

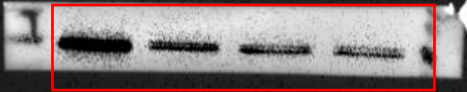

**GAPDH-Used in paper**

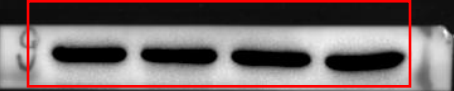

# Figure 2

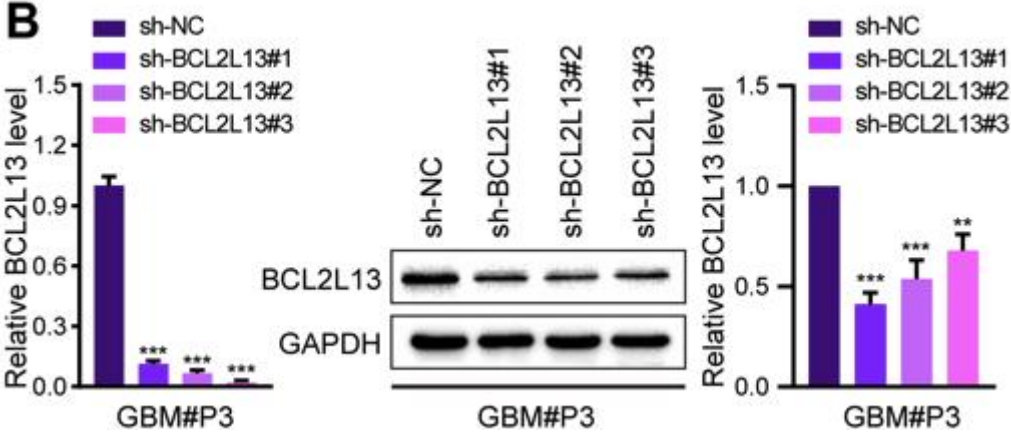

**BCL2L13-Used in paper**

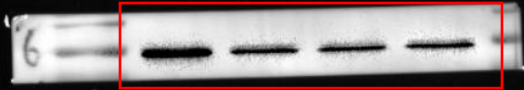

**GAPDH-Used in paper**

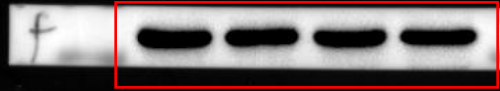

# Figure 2

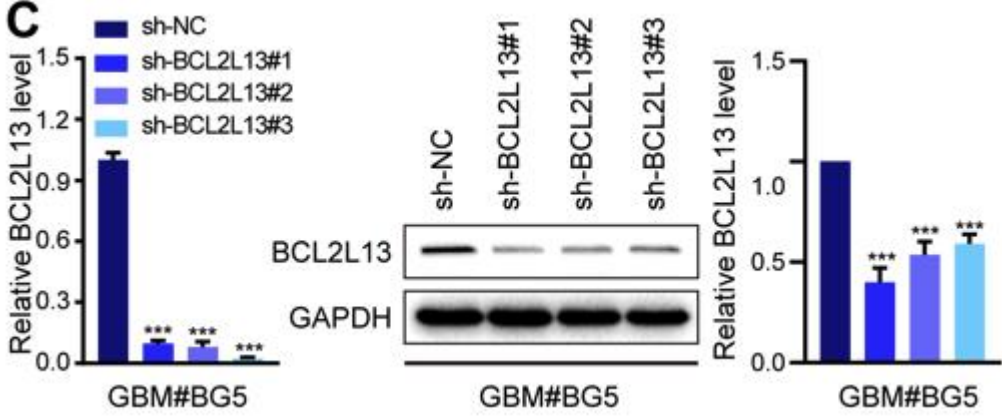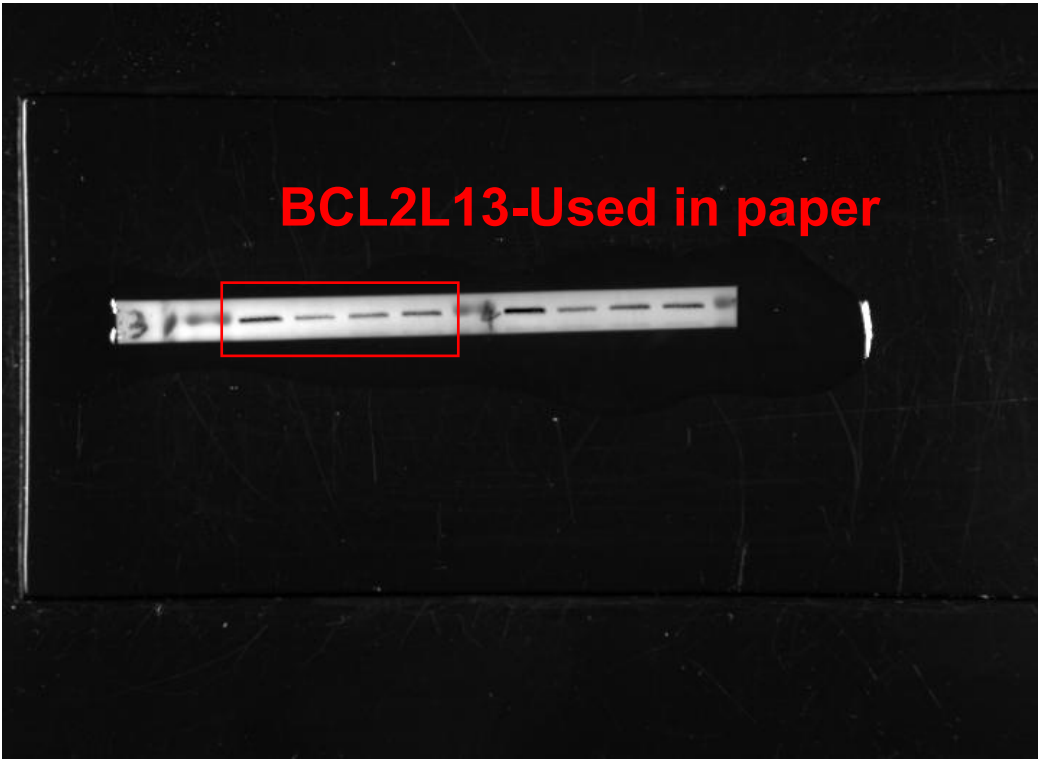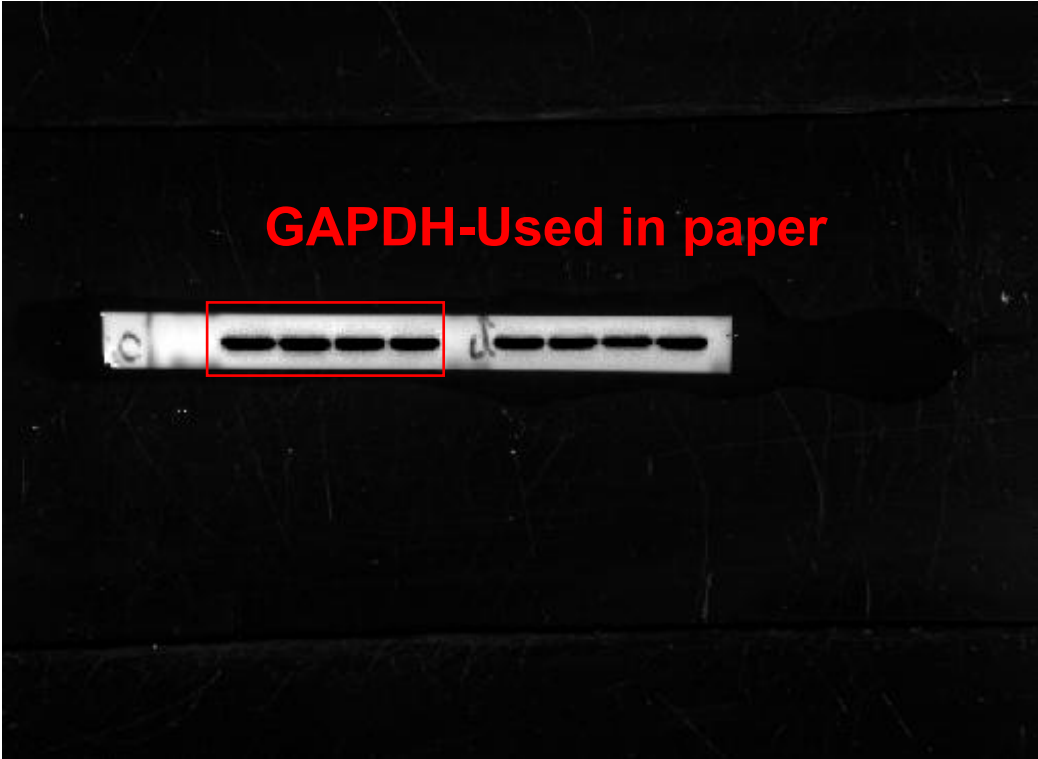

# Figure 4

## D

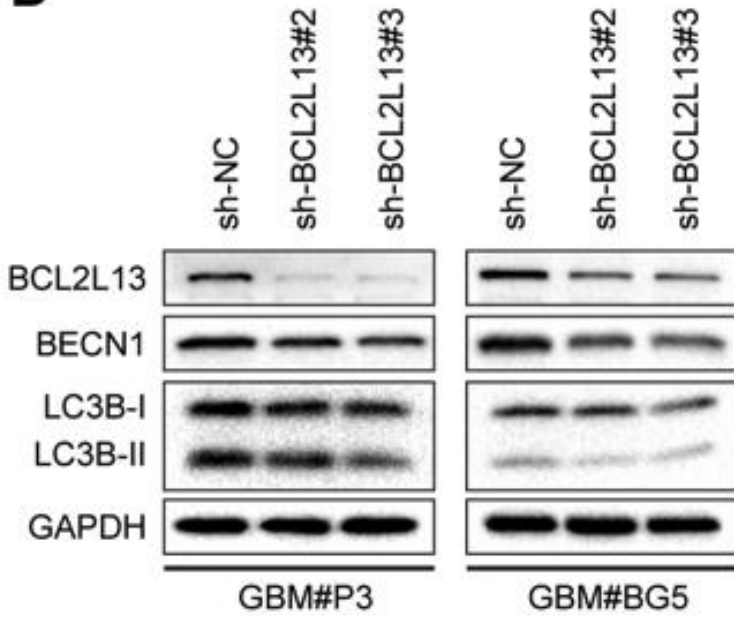

## GBM#P3

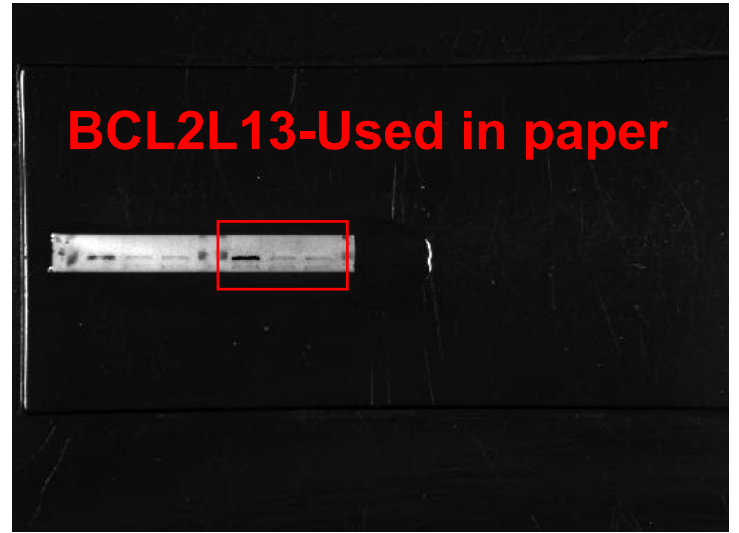

**GAPDH-Used in paper**

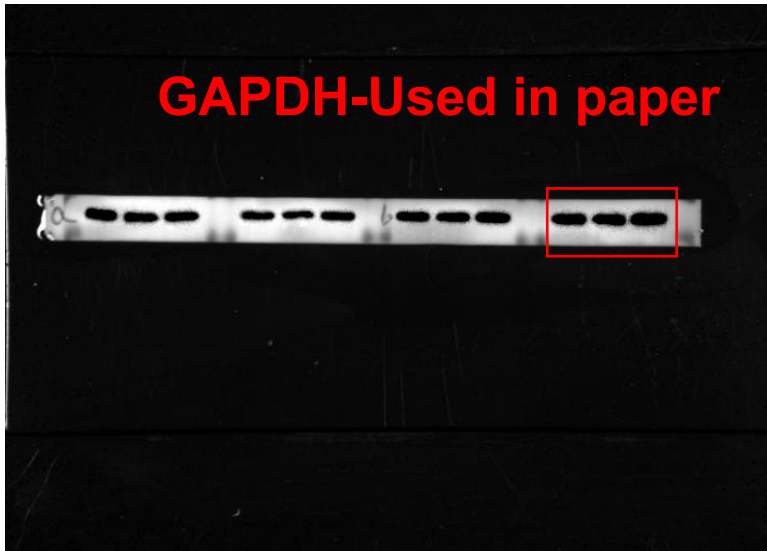

**BECN1-Used in paper**

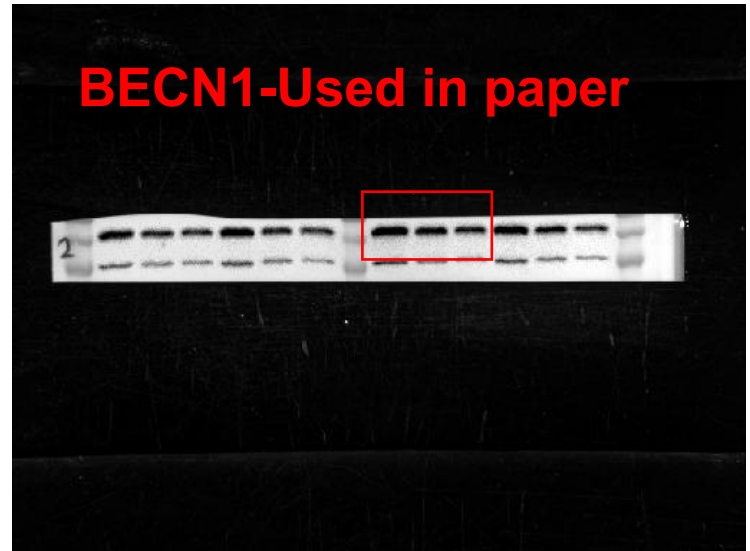

**LC3B-Used in paper**

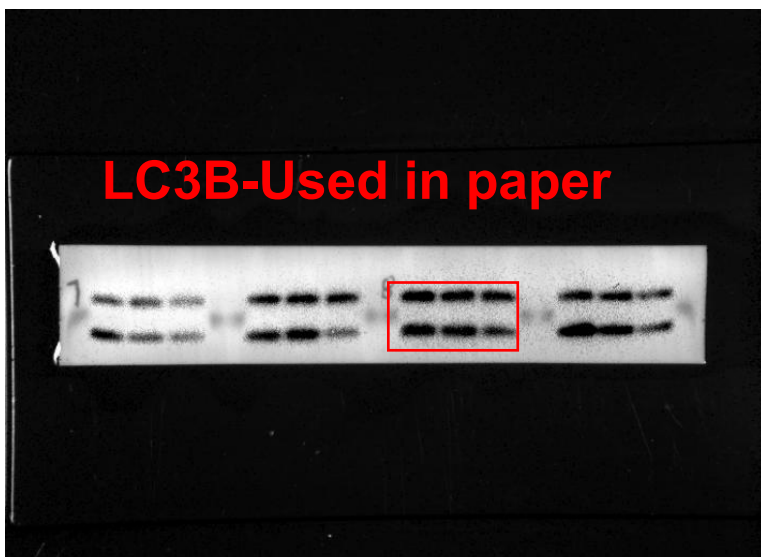



**Figure 4**

**D**

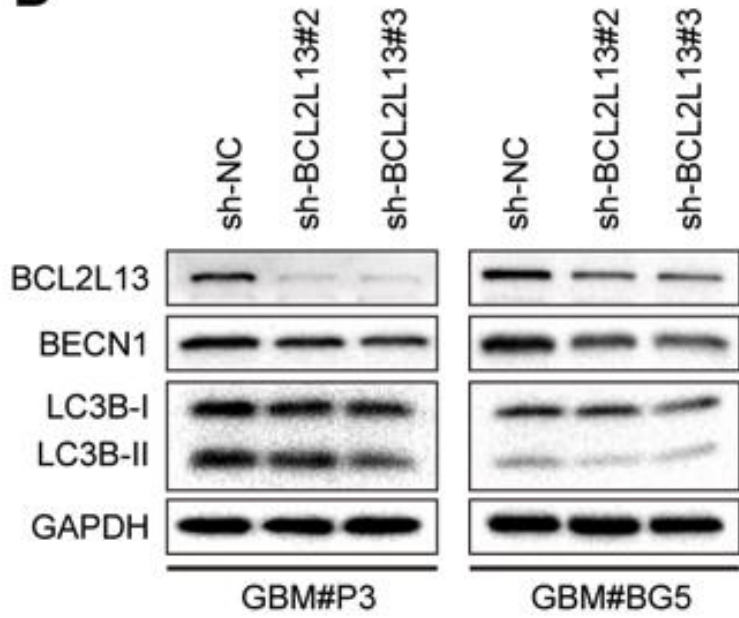

**GBM#BG5**

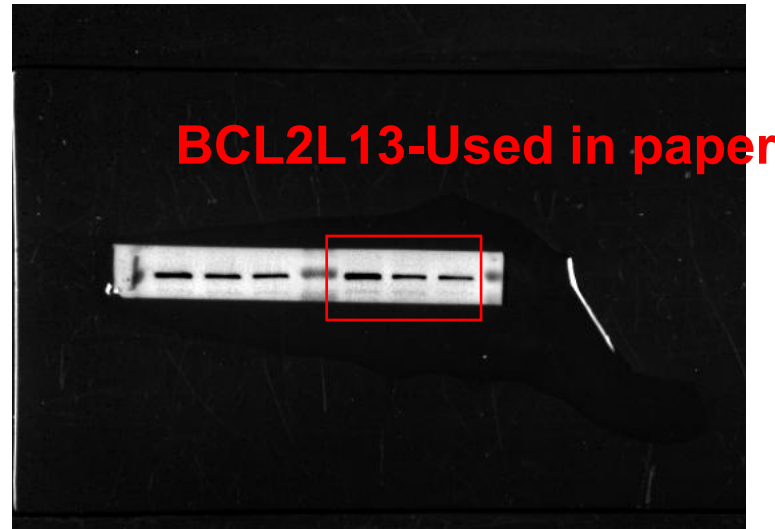

**GAPDH-Used in paper**

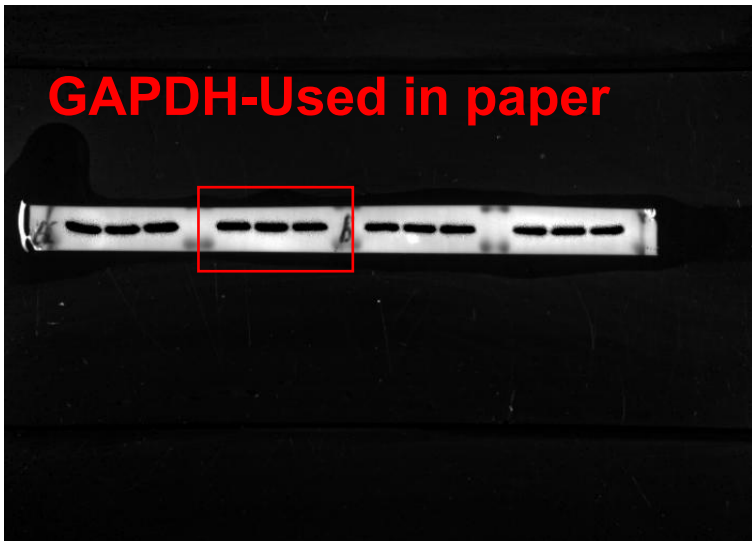

**BECN1-Used in paper**

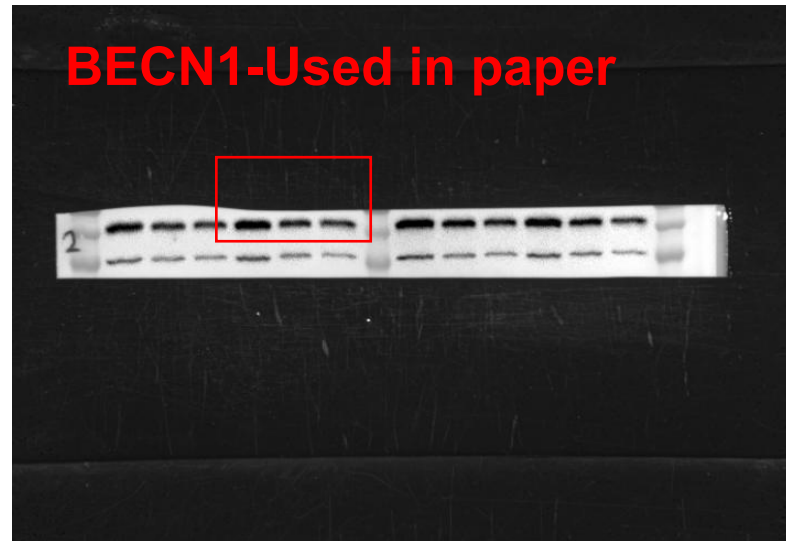

**LC3B-Used in paper**

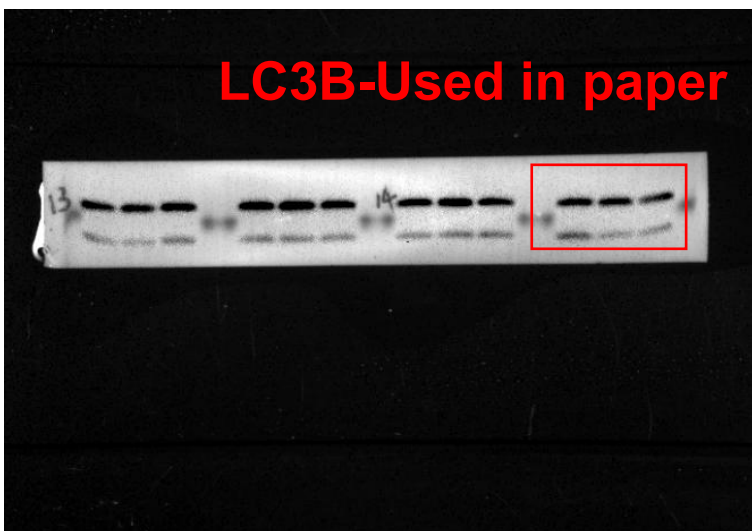

# Figure 4

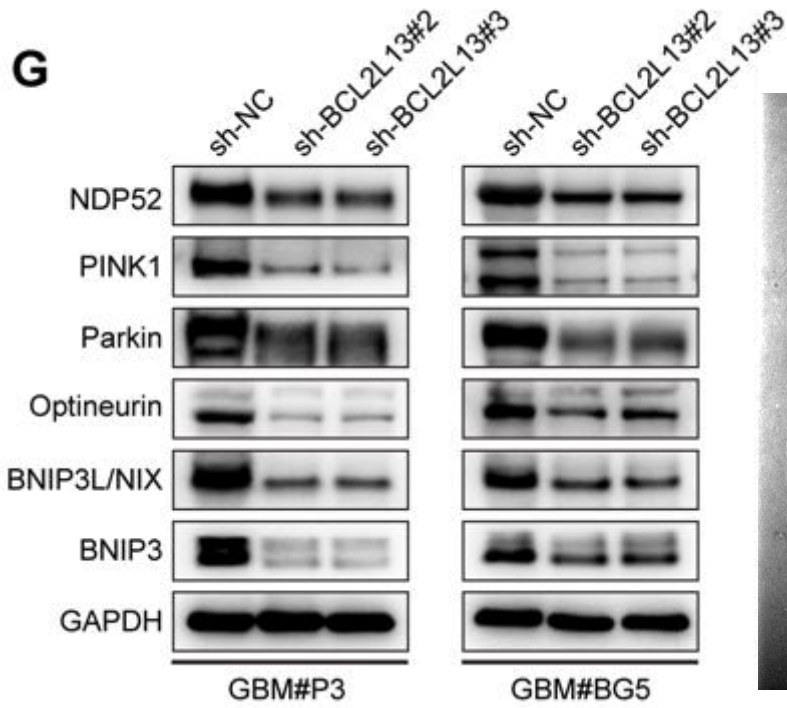

**GBM#P3**

**NDP52-Used in paper**

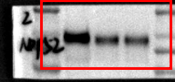

**PINK1-Used in paper**

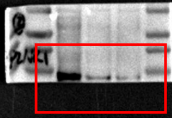

**Parkin-Used in paper**

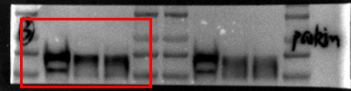

**Optineurin-Used in paper**

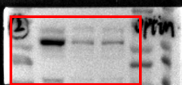

**BNIP3L/NIX-Used in paper**

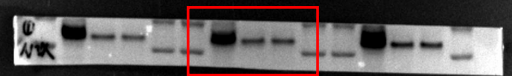



# Figure 4

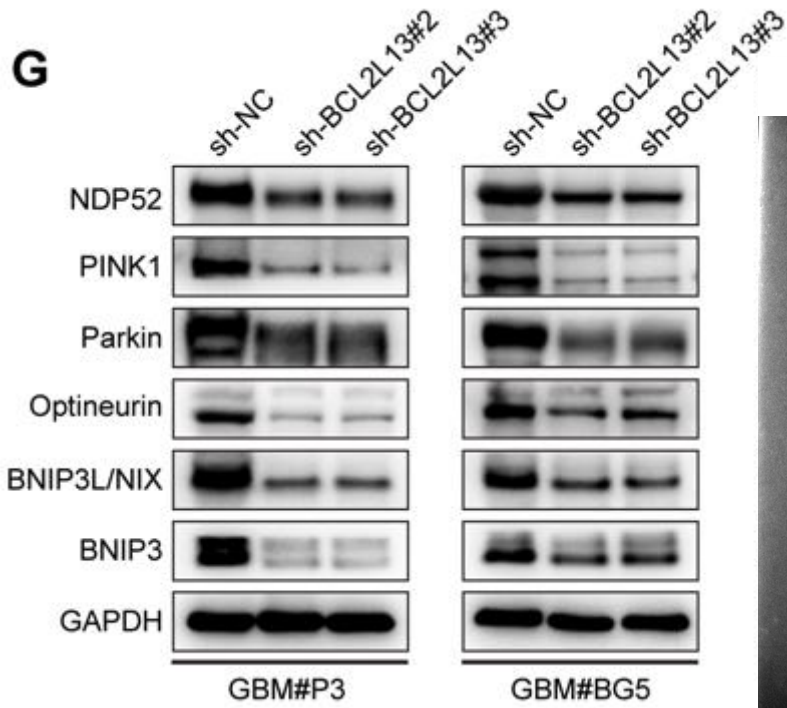

**GBM#P3**

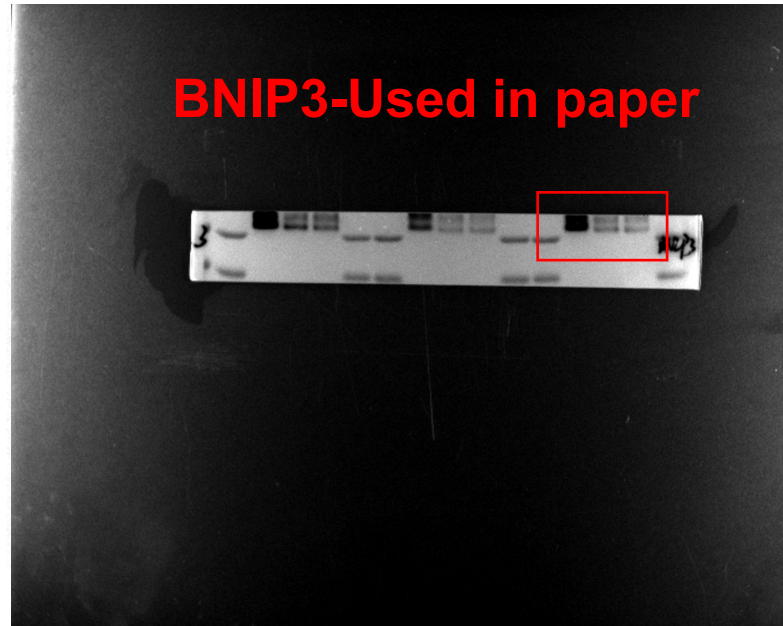

**GAPDH-Used in paper**

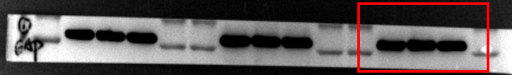



# Figure 4

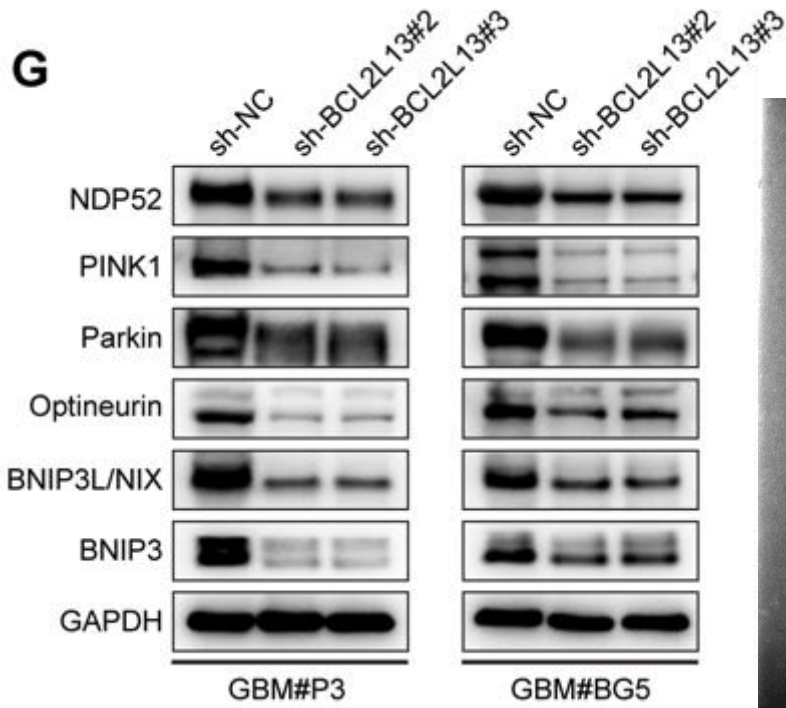

**GBM#BG5**

**NDP52-Used in paper**

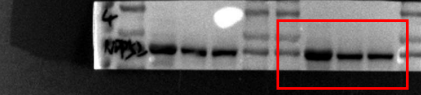

**PINK1-Used in paper**

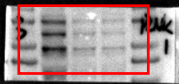

**Parkin-Used in paper**

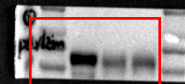

**Optineurin-Used in paper**

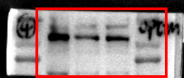

**BNIP3L/NIX-Used in paper**

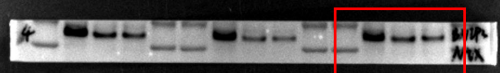

# Figure 4

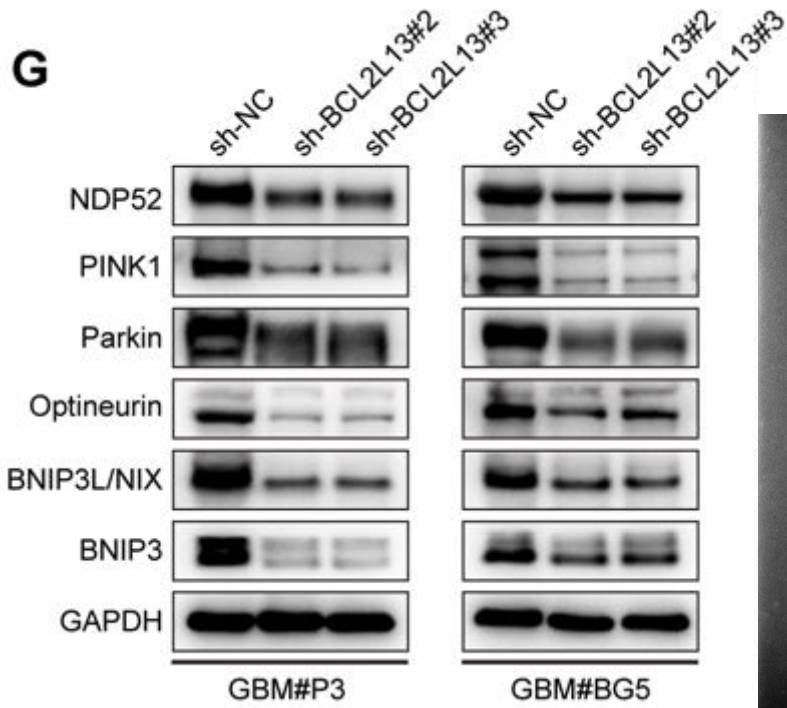

**GBM#BG5**

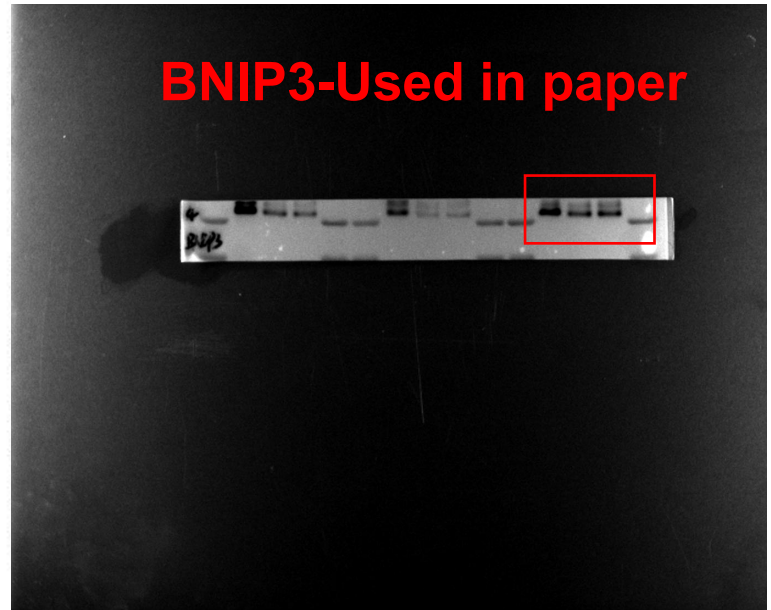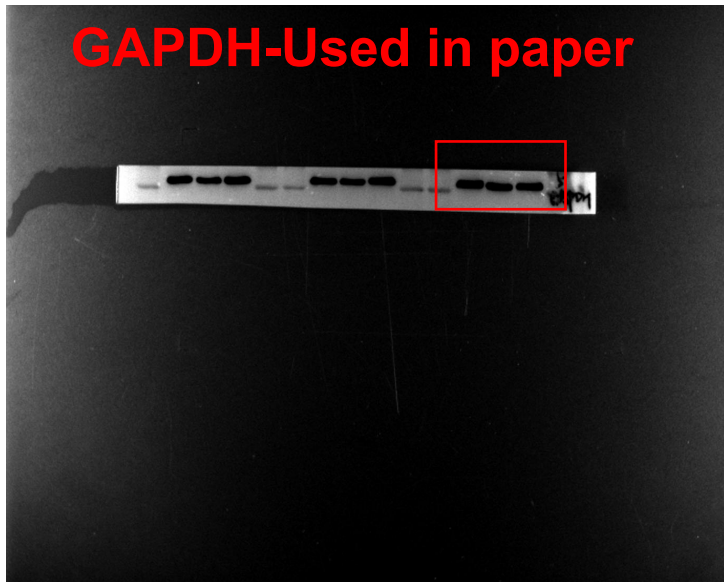

# Figure 5

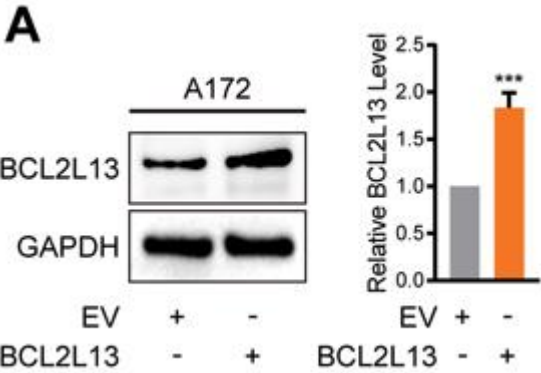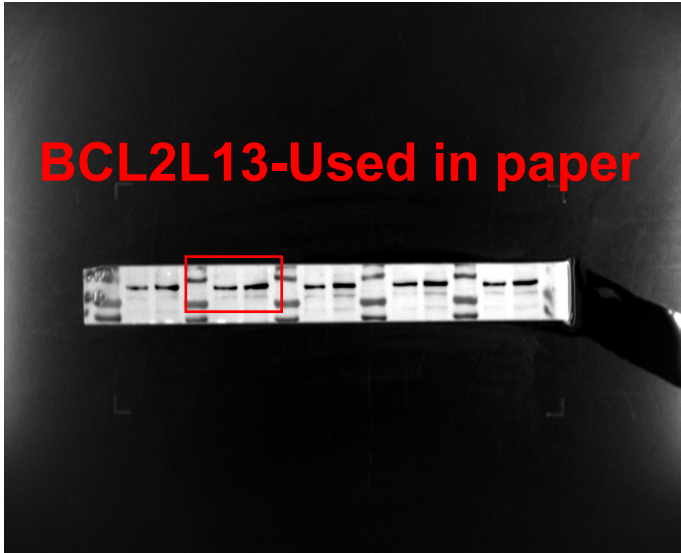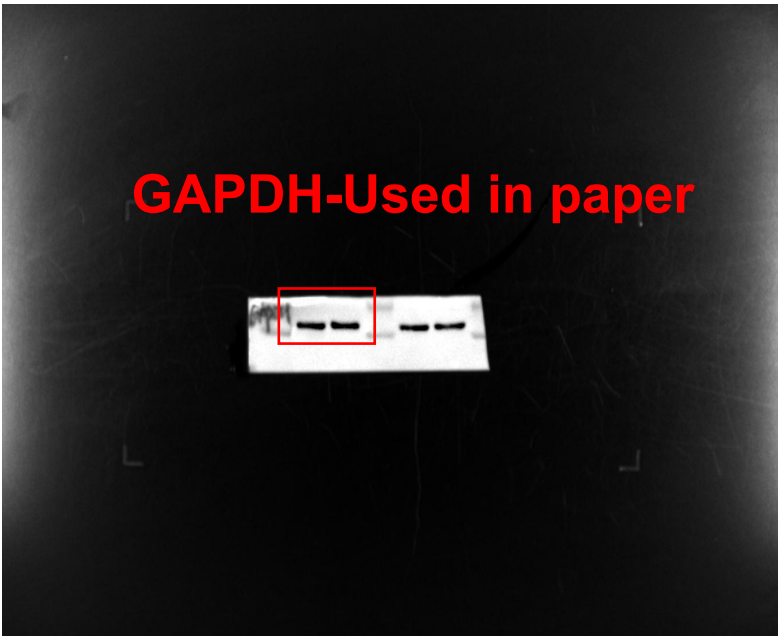



# Figure 5

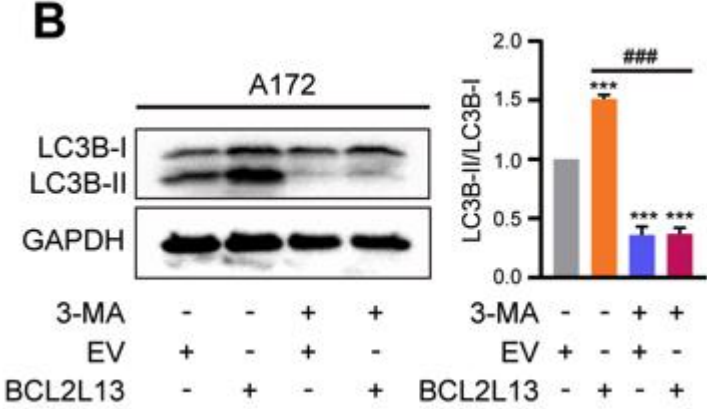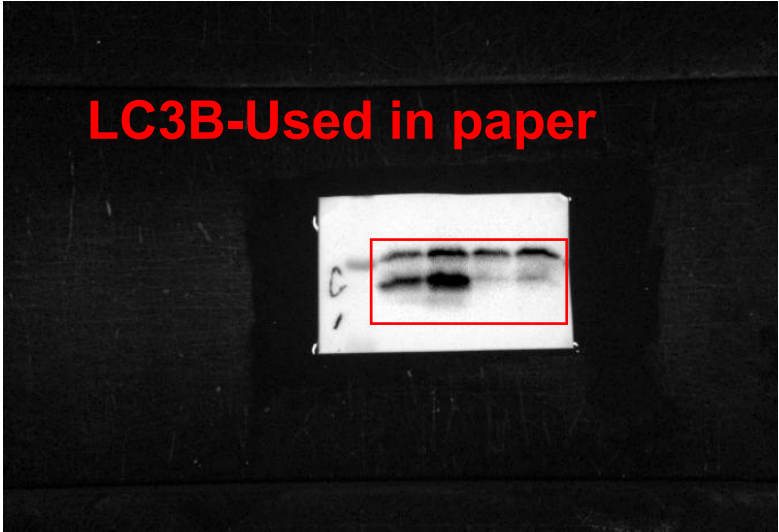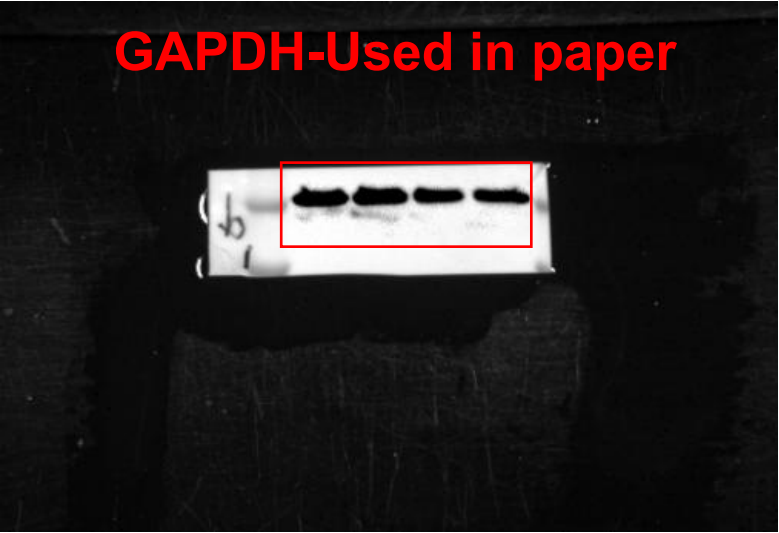



# Figure 5

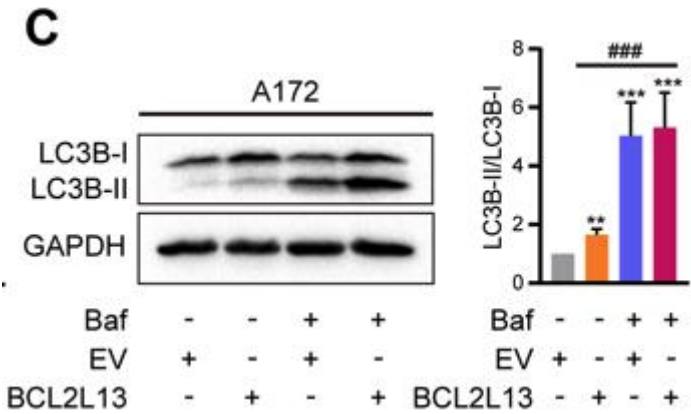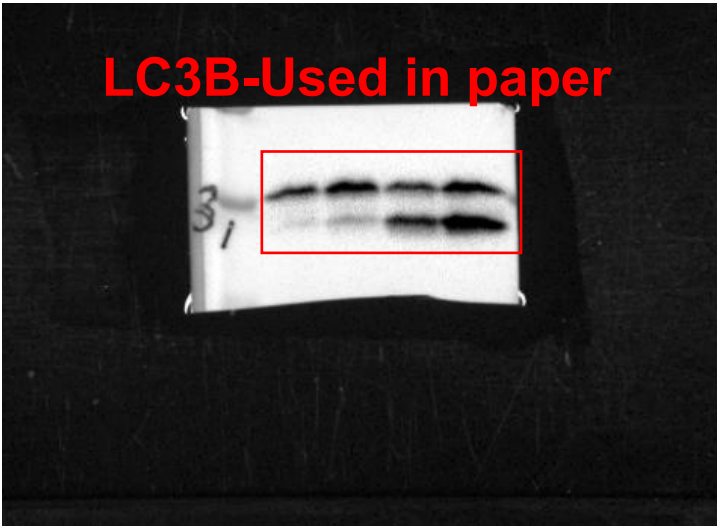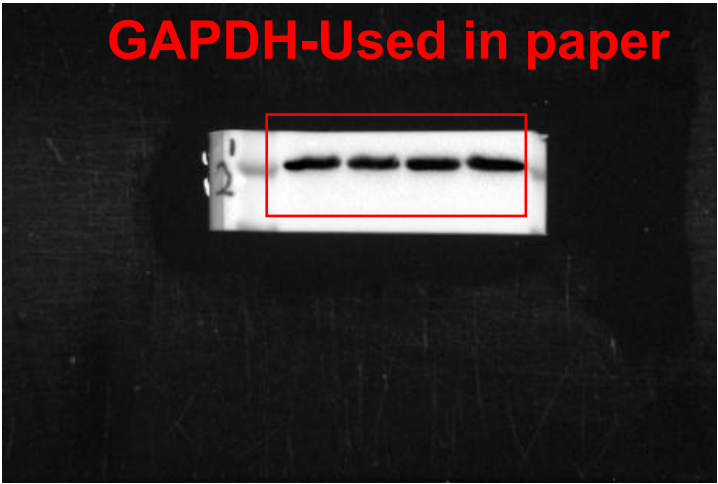

# Figure 6

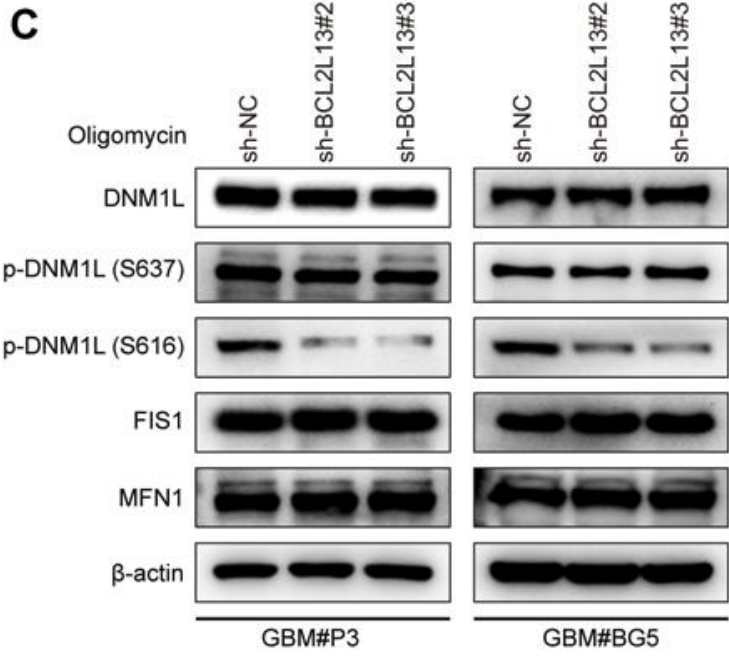

**GBM#P3**

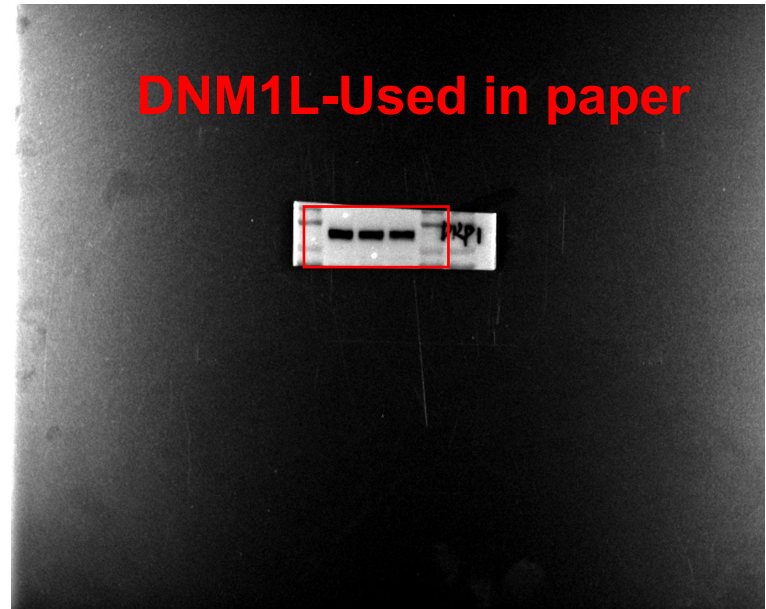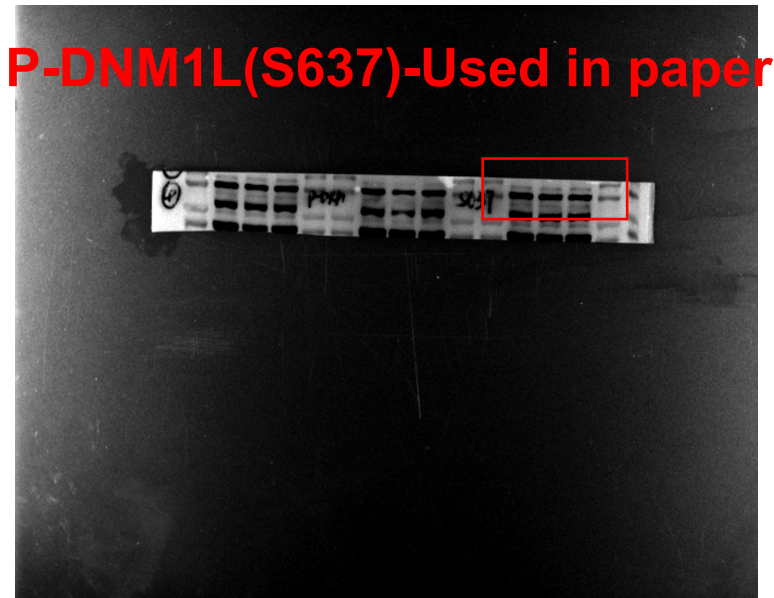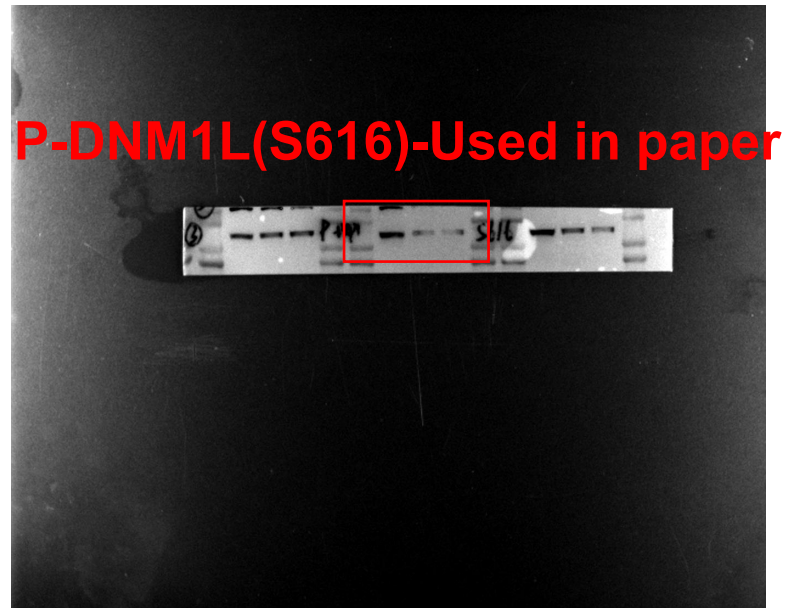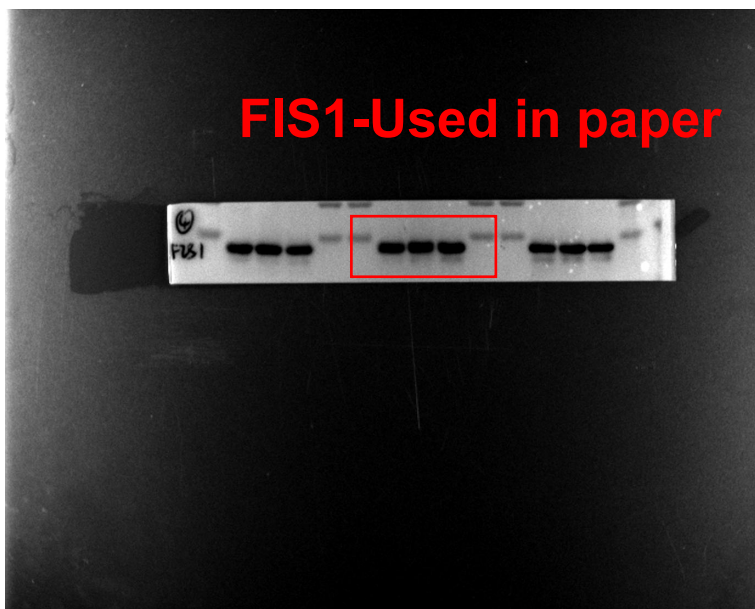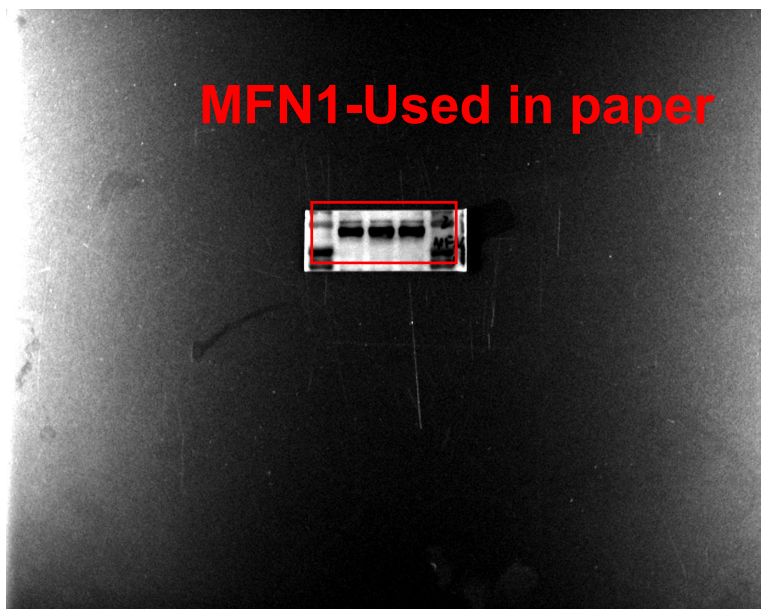

# Figure 6

C

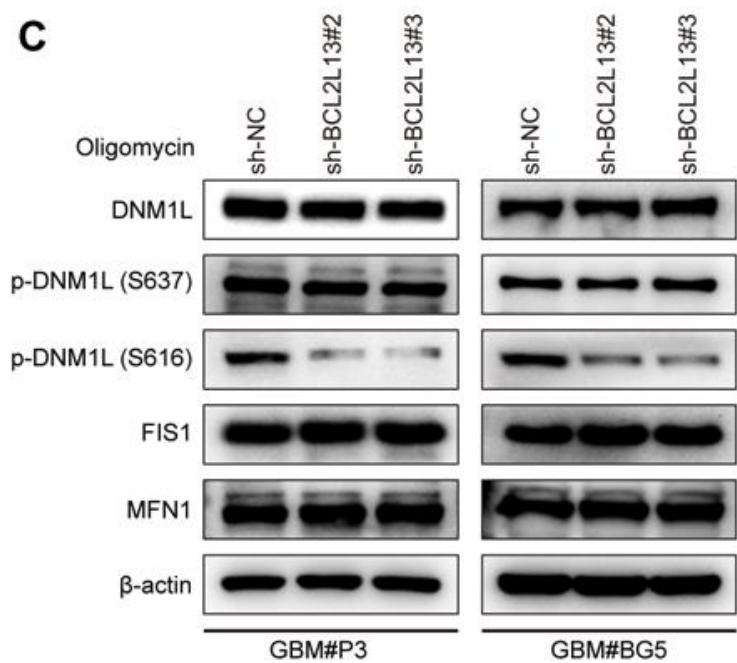

**GBM#P3**

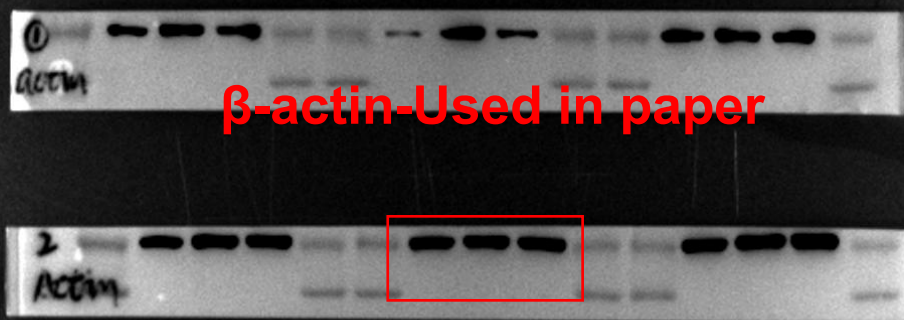



# Figure 6



**GBM#BG5**

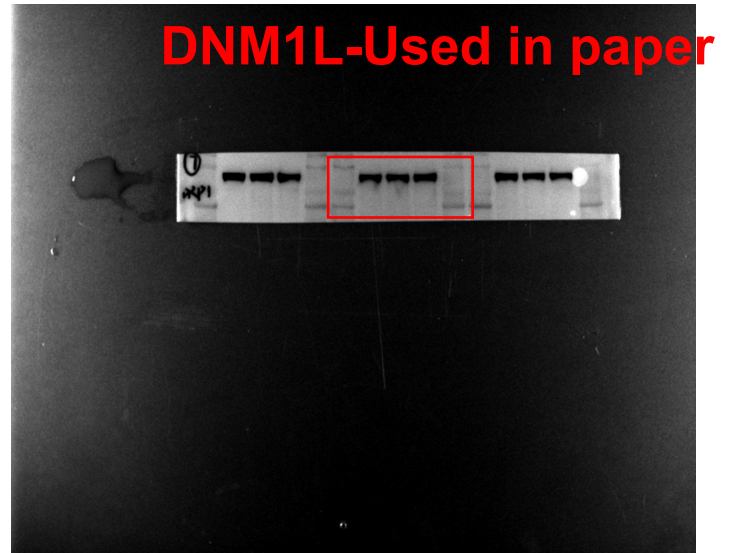

**P-DNM1L(S637)-Used in paper**

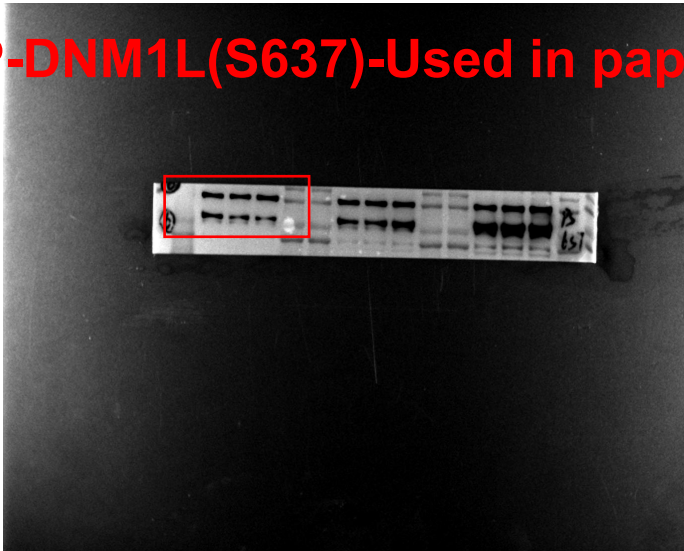

**P-DNM1L(S616)-Used in paper**

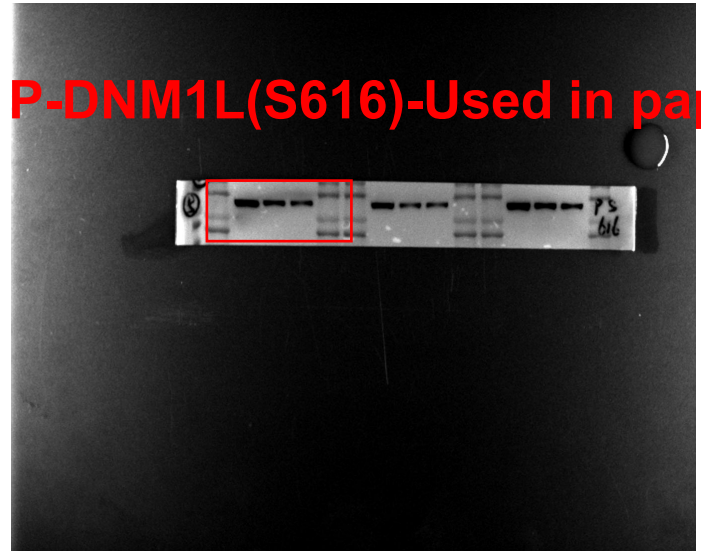

**FIS1-Used in paper**

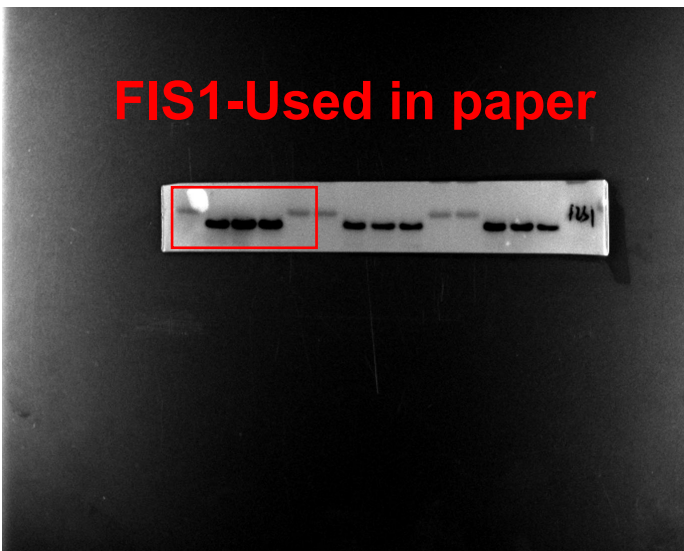

**MFN1-Used in paper**

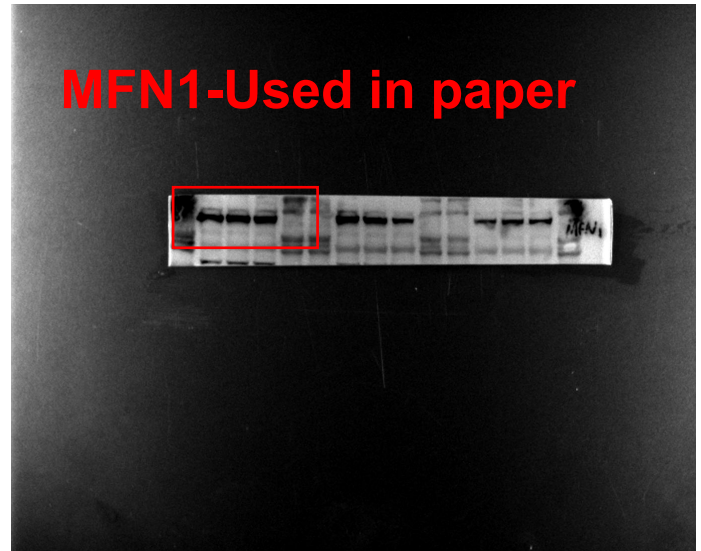



# Figure 6

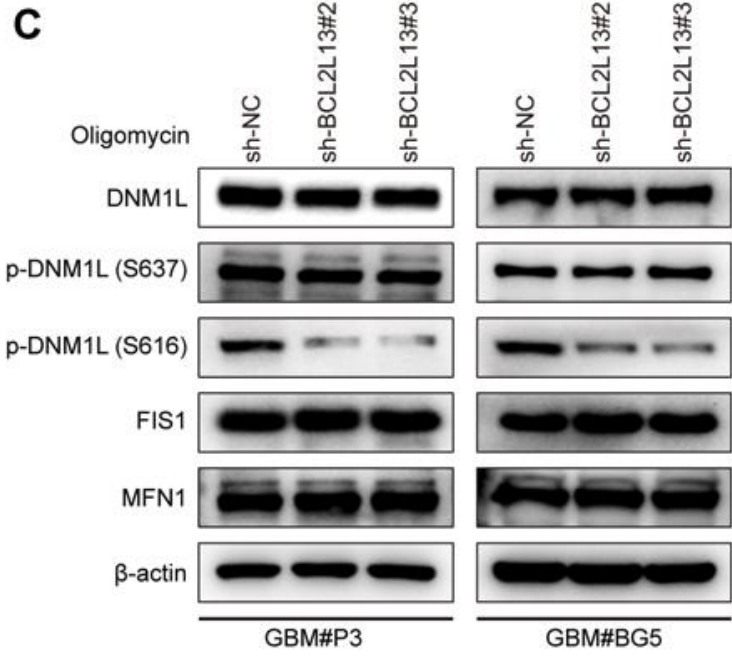

**GBM#BG5**

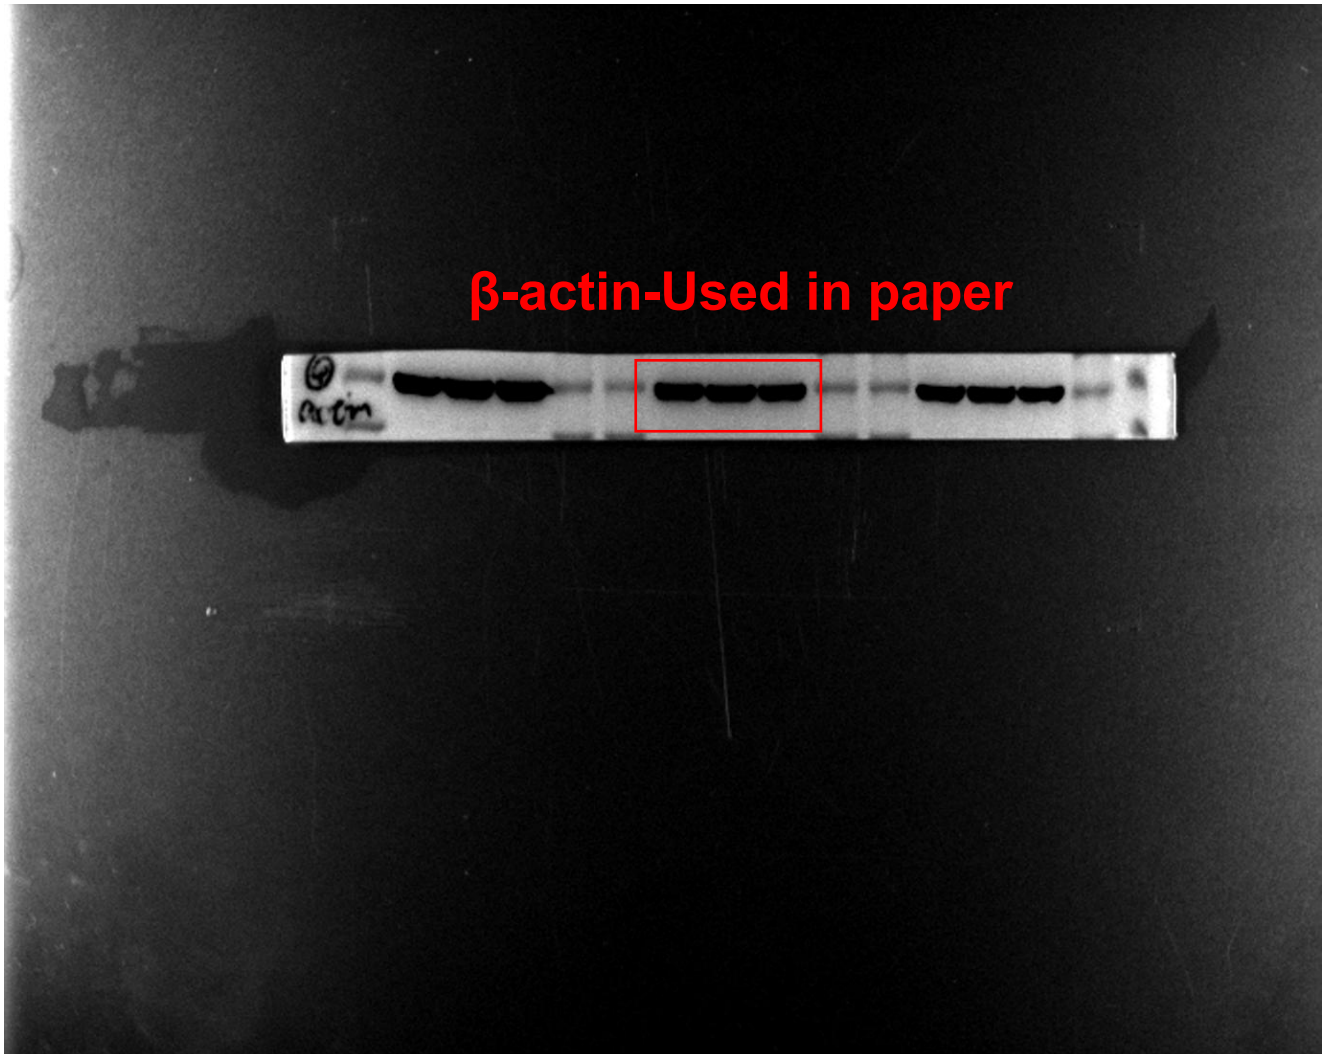

# Figure 7

D

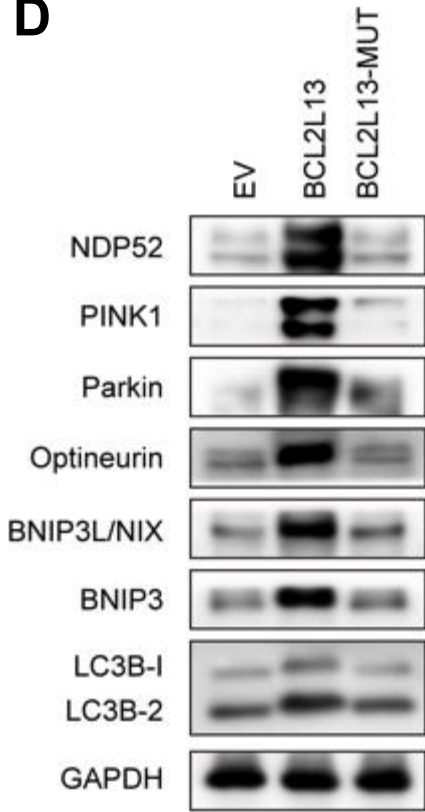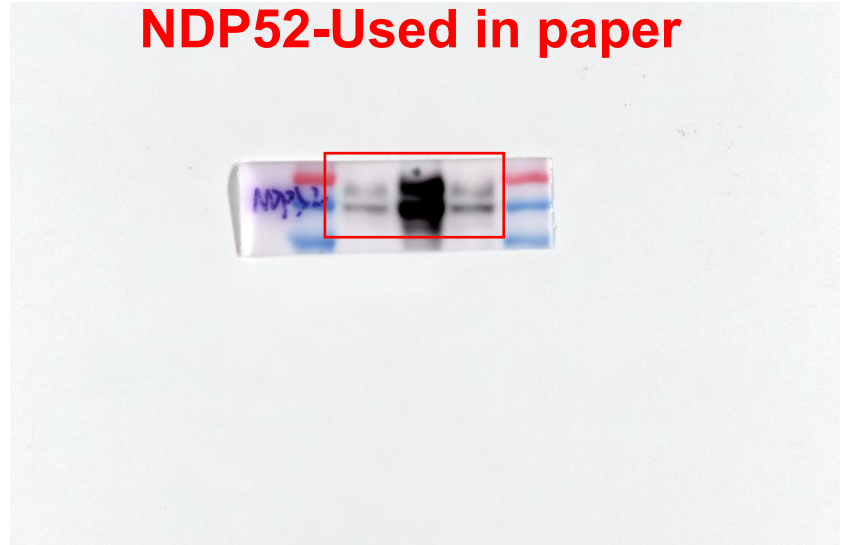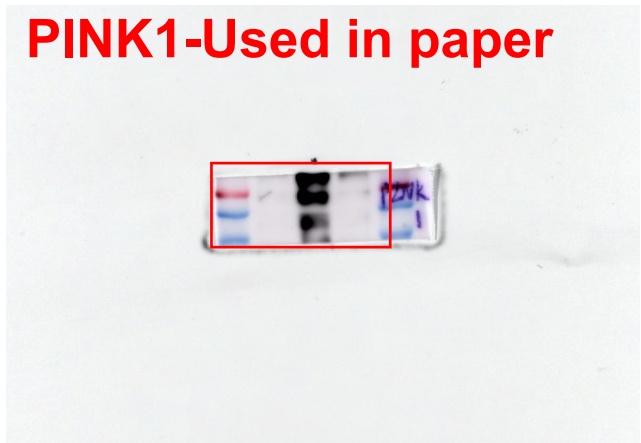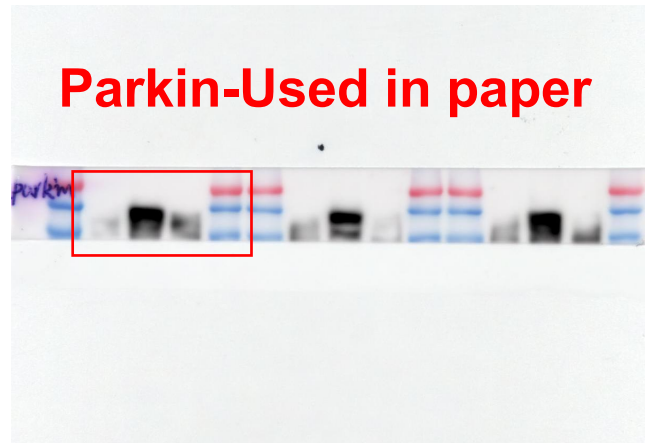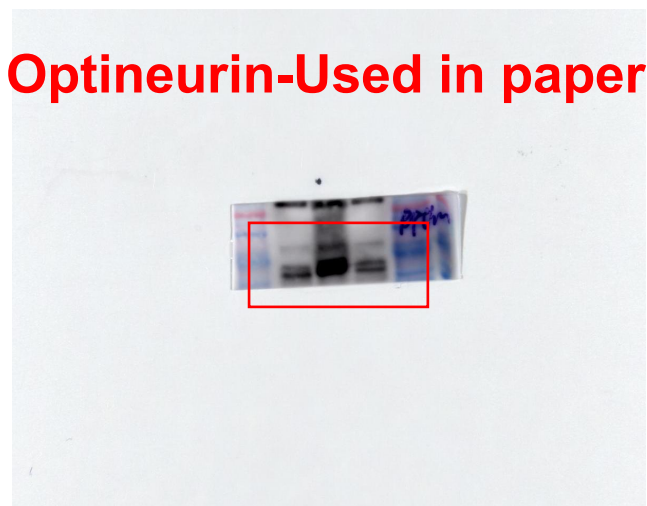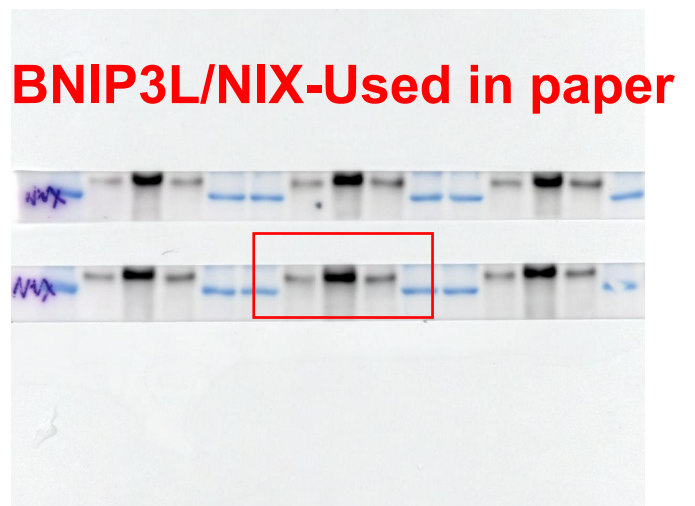

# Figure 7

D

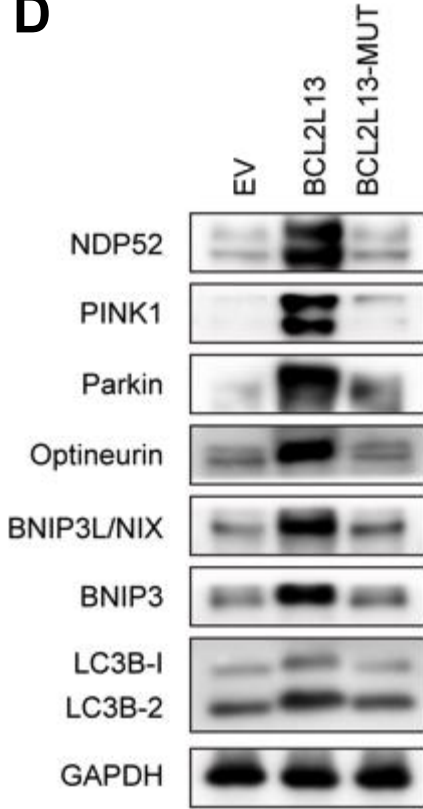

**BNIP3-Used in paper**

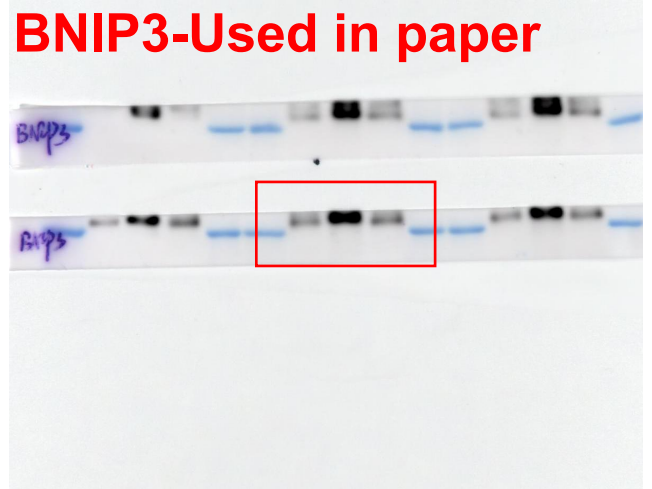

**LC3B-Used in paper**

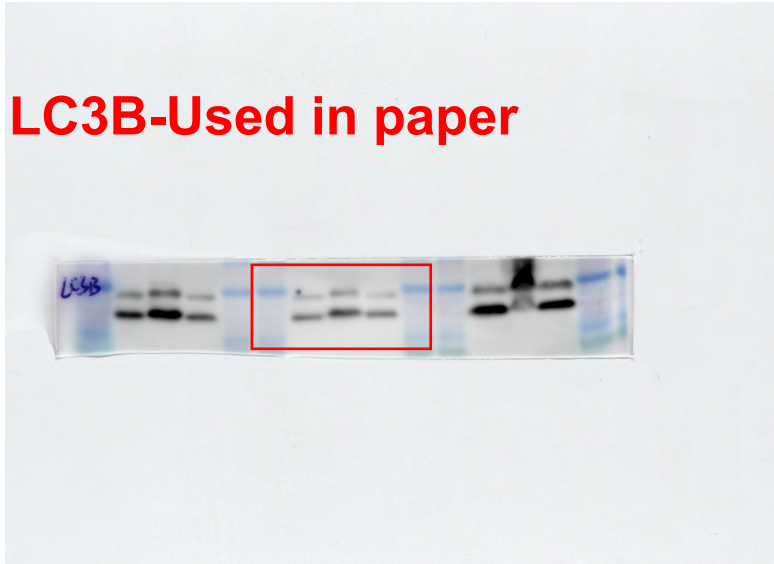

**GAPDH-Used in paper**

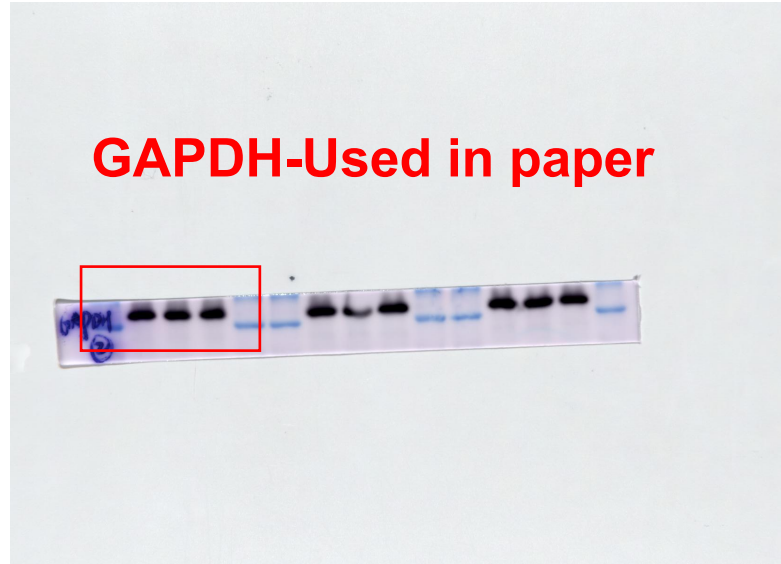

# Figure 7

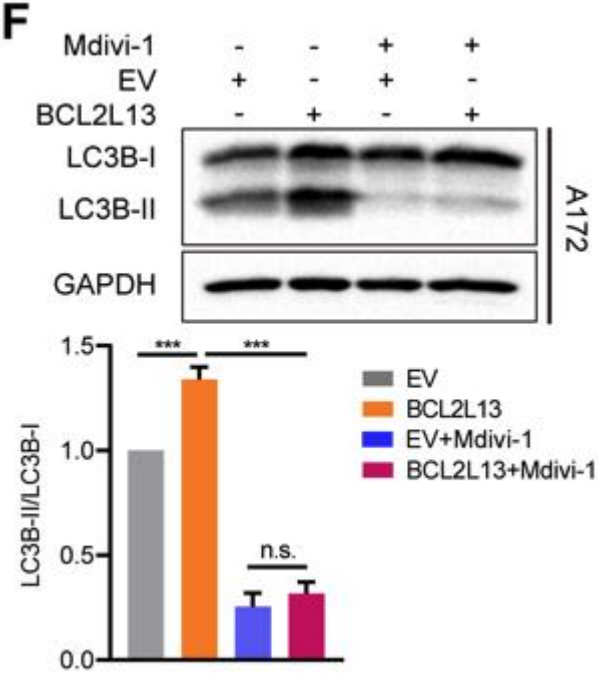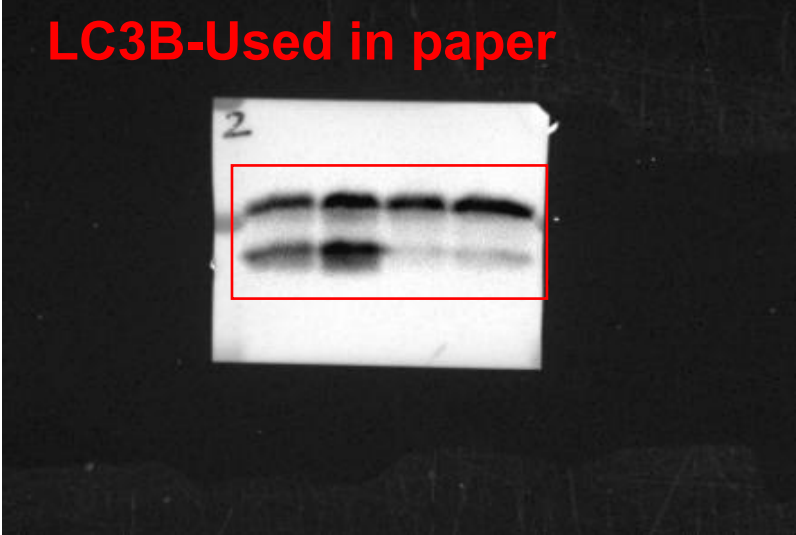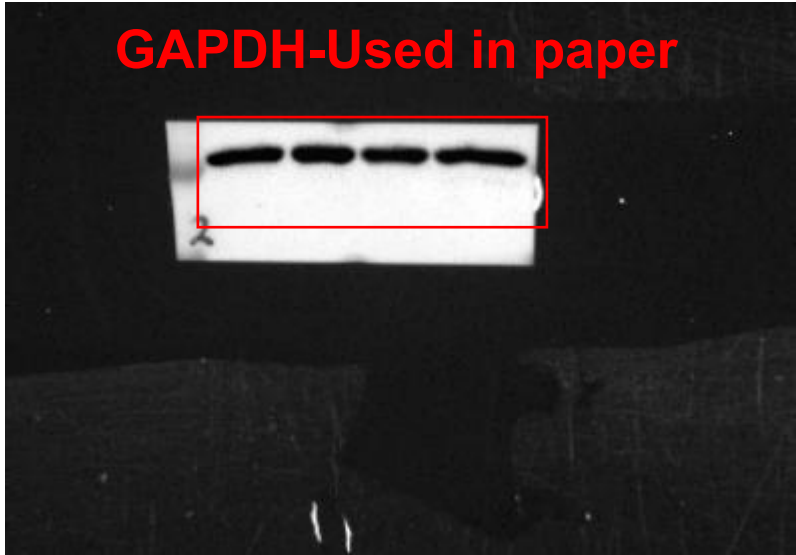

Supplement: 41419_2023_6112_MOESM6_ESM.pdf [file 41419_2023_6112_MOESM6_ESM.pdf]
